# Supplementary material for: Prevention of obsessive-compulsive disorder in at-risk children: A feasibility trial
Source: Research Square preprint supplement (doi:10.21203/rs.3.rs-7514778/v1), 2025-09-23
Supplement: Supplementary file 1 [file e7a65edb37c94fde7cd919db.docx]

**ONLINE SUPPLEMENT**

**eMethod**

**Question about avoidance**

“Has your child been avoiding doing anything, going any place or being with anyone because of his/her fears/obsessions, or out of concern that it will trigger compulsions? For example, your child may not touch things at home or in public places due to fear of contamination, or avoid touching knifes out of fear of causing harm. Please rate the degree to which your child deliberately tries to avoid things during the last week.”

| 0 | 1 | 2 | 3 | 4 | 5 | 6 | 7 | 8 |
| --- | --- | --- | --- | --- | --- | --- | --- | --- |
| Not at all |  | A little |  | Quite a bit |  | A lot |  | Extremely |

**Knowledge test – version A**

You are now going to answer a few questions about OCD. You’ll answer similar questions before and after the program so that we can see whether the program helps participants gain more knowledge about OCD and how to manage it. Are you ready?

1. Which of the following increases the risk of a person developing OCD? You can choose one or more options.
2. Having OCD symptoms during childhood
3. Having parents with a strict parenting style
4. Having OCD in the family
5. The child having a strong temperament
6. Tove is the parent of Stina, who is 8 years old. Since she was 6, Stina has been washing her hands for longer than necessary, especially after coming home from playing outside. In recent months, she has also avoided using toilets that are not at home. When Tove asks Stina what she finds difficult, Stina usually says “I don’t know,” but has also said she feels scared. Tove believes Stina is afraid of passing germs to others, especially her grandmother.

   What do researchers think contributes most to Stina continuing to have OCD symptoms? You can choose one or more options.
7. That she feels scared
8. That she doesn’t quite know why she is scared
9. That she avoids using public toilets
10. That she washes her hands for a long time
11. Which of the following strategies are helpful in preventing OCD symptoms?
    You can choose one or more options.
12. Parents responding with reassurance
13. Helping the child reduce the behaviours they use to manage anxiety
14. Parents using a responsive parenting style
15. Letting the child practice doing things they find uncomfortable
16. Stina avoids using toilets outside the home, and she and Tove have started practicing this together. They began with toilets that felt less scary to Stina, such as those at school or at Tove’s workplace. Stina finds it hard and feels anxious when they practice. What do you think Tove could try saying to help Stina?
17. I can see this is hard for you, I’m really impressed that you’re using the toilet anyway.
18. You can use my hand sanitizer afterwards, and then nothing bad will happen.
19. I understand that you don’t want to do this—you don’t have to if you don’t want to.
20. Tove has noticed that Stina asks questions about whether she could make others sick and is especially worried about infecting her grandmother. Tove has tried to calmly reassure her that she won’t make her grandmother sick, but Stina still asks several times when they are about to visit her. On one occasion when Tove didn’t answer, Stina became extremely upset and started hyperventilating, which was very difficult for Tove to witness.

    What do you think Tove could say when Stina is worried and asks a question?
21. We could cancel the visit to grandma if that would make you feel less worried.
22. I know you’re scared that grandma will get sick, but I think you can handle seeing her even if I don’t answer.
23. We can be extra careful with handwashing and avoid hugging grandma while we’re there.

**Knowledge test – version B**

You are now going to answer a few questions about OCD. You’ll answer similar questions before and after the program so that we can evaluate whether the program helps participants gain more knowledge about OCD and how to manage it. Are you ready?

1. How might a parent notice that their child has symptoms of OCD? You can choose one or more options.
2. The child does things to make the anxiety feel less overwhelming
3. The parent finds themselves nagging the child a lot
4. The child is very hyperactive
5. The parents adjust their own behaviour so the child won’t get scared
6. Maral is the parent of Alexander, who is 7 years old. Alexander has always been a bit anxious. Over the past year, he has become more afraid that someone will break in or that a fire will start at home. When he gets worried, he checks that the door is locked and that the stove is off. He also sometimes asks one of his parents if something bad might happen, and they respond, “No, there’s nothing dangerous.”

   What do researchers think contributes most to Alexander continuing to have OCD symptoms? You can choose one or more options.
7. That he is afraid of burglaries or fires
8. That he is easily worried
9. That he checks the door and stove
10. That his parents answer his questions
11. Which of the following strategies are helpful in reducing OCD symptoms? You can choose one or more options.
12. Parents making adjustments so the child won’t feel anxious
13. Practicing the difficult situation in many different contexts
14. Parents reducing the accommodations they make because of OCD symptoms
15. Avoiding situations that cause the child anxiety
16. Alexander usually doesn’t want to help with cooking. When he gets anxious, he checks whether the stove is turned off. That’s why Maral and Alexander are practicing baking together and then going out to the park for a snack. This way, they practice turning off the oven and being unable to go back and check it. While they are sitting in the park, Alexander says he wants to go back inside to make sure the stove is really off.

What do you think Maral could try saying to help Alexander?

1. We can call dad and ask him to send us a picture of the stove if you want?
2. I know this feels really hard for you, but I also know that you can manage not to check the stove!
3. Sure, we can go back and check if you want.
4. Maral feels that Alexander has always been a bit anxious and often asks his parents questions when he is worried about something. Right now, his questions are mostly about whether there might be a break-in or a fire—he might ask, “Is the door locked?”, “Are you sure the stove is off?”, or “Can something bad happen?”. Sometimes Alexander also asks Maral to check the stove before they leave the house, and Maral usually does because it helps them get out the door faster.

   What do you think Maral could say when Alexander is worried and wants her to check the stove?
5. I can see that you’re worried right now, but I think you can manage to leave the house without me checking the stove.
6. If you want, we could stop using the stove in the mornings since it causes so much worry.
7. Do what you think is best—how would you like me to check the stove?

**eResults**

| **eTable 1.** Support time | | | |
| --- | --- | --- | --- |
| **Question** | **n** | **M (SD)** | **Range** |
| Telephone interview | 35 | 26.9 (8.6) | 12-45 |
| Inclusion assessment | 35 | 22.8 (8.1) | 10-42 |
| Support time during the program | 7 | 9.1 (8.0) | 1-21 |
| 6-month follow-up assessment a | 33 | 16.9 (9.0) | 6-56 |
| 12-month follow-up assessment a | 32 | 24.9 (19.9) | 5-88 |
| a Includingthe time for both the phone assessment and subsequent video assessments | | | |

| **eTable 2.** Questions about credibility and expectancy a | | |
| --- | --- | --- |
| **Question** | **M (SD) b** | **Range** |
| 1 – How logical do you think this program is? | 8.3 (1.7) | 5-10 |
| 2 – How sure are you that this method will be successful in increasing your skills in preventing OCD in your child? | 6.6 (2.0) | 0-10 |
| 3 – Would you recommend this program to another parent? | 8.3 (1.8) | 5-10 |
| 4 – How good do you think this kind of program would be to prevent another kind of mental illness? | 7.4 (1.9) | 4-10 |
| 5 – How much better do you expect to get in preventing OCD in your child after this program? | 7.2 (1.9) | 3-10 |
| a The questions were completed by 33/35 parents (94.5%)  b The questions were rated on a scale from 0 to 10, with larger values indicating higher credibility and expectancy | | |

| **eTable 3.** Questions about satisfaction with the program a | | | |  | |  |
| --- | --- | --- | --- | --- | --- | --- |
|  | **No. (%) b** | | | | | |
| **Question** | **1** | **2** | **3** | | **4** | |
| 1 – Do you think the program you have received has been good? | 0 (0) | 1 (2.9) | 18 (51.4) | | 16 (45.7) | |
| 2 – Did you get the type of program you wanted? | 0 (0) | 5 (14.3) | 20 (57.1) | | 10 (28.6) | |
| 3 – Do you think our program was enough for your needs? | 0 (0) | 7 (20.0) | 16 (45.7) | | 12 (34.3) | |
| 4 – If a friend would need similar help, would you recommend our program to her or him? | 0 (0) | 2 (5.7) | 12 (34.3) | | 21 (60.0) | |
| 5 – Have the program helped you to handle your child’s symptoms in a better way? | 0 (0) | 3 (8.6) | 22 (62.8) | | 10 (28.6) | |
| 6 – In total, how satisfied are you with the program you have received? | 0 (0) | 2 (5.7) | 17 (48.6) | | 16 (45.7) | |
| 7 – If you would need help again, would you consider participating in another program or treatment from us? | 0 (0) | 1 (2.9) | 11 (31.4) | | 23 (65.7) | |
| a The questions were completed by 35/35 parents (100 %)  b The questions were rated on a 4-point scale where higher values indicating higher satisfaction, for example from 1 = “No, not at all” to 4 = “Yes, absolutely” | | | | | | |

**eFigure 1.** Module completion
